# Supplementary material
Source: publisher figshare collection journal article supplement (https://rs.figshare.com/ndownloader/files/12481553)
Supplement: Supplementary file 1 [file 12481553]

**Supplementary data**

**Snf7-Vps2 chimera sequence**

Myristoylation sequence from Vps20

Snf7 sequence

Linker-Vps2 MIM

ATGGGCCAAAAAAGTAGTAATGCCAAGAATAAAGAGTCACCAACAAAGGCCATAGTGCGGTTGAGGGAGCATATCAACCTTCTATCCAAAAAGCAATCGCATTTACGTACTCAAATTACAAATCAAGAGAATGAAGCTAGAATCTTTTTGACGAAGGGCAATAAAGTAATGGCGAAGAATGCACTTAAAAAGAAGAAGACAATCGAACAACTTTTAAGTAAGGTAGAAGGCACAATGGAGTCTATGGAACAGCAGCTATTCTCTATAGAAAGTGCAAACTTAAATCTAGAGACAATGAGGGCTATGCAGGAAGGTGCTAAGGCAATGAAAACTATTCACAGTGGCCTTGACATAGATAAAGTGGATGAAACTATGGACGAGATAAGGGAGCAAGTCGAATTAGGAGATGAAATAAGCGACGCTATATCCAGGCCTTTAATTACTGGGGCAAACGAGGTGGATGAAGATGAGCTGGACGAGGAATTGGACATGCTGGCTCAAGAAAATGCTAACCAAGAAACGTCCAAGATCGTTAATAATAATGTTAATGCGGCGCCTATCTCAGAGAACAAAGTCTCACTACCTAGTGTTCCAAGTAATAAAATTAAACAAAGTGAGAACTCTGTGAAGGACGGGGAAGAGGAAGAGGATGAAGAAGATGAAGATGAAAAAGCATTAAGAGAACTACAAGCAGAAATGGGGCTTGGTGGTGGTGGTTCTGGTGGTGGTGGTTCTGGTGGTGGTGGTTCTGACGACGACCTGCAGGCTCGTCTGAACACCCTGAAA

MGQKSSNAKNKESPTKAIVRLREHINLLSKKQSHLRTQITNQENEARIFLTKGNKVMAKNALKKKKTIEQLLSKVEGTMESMEQQLFSIESANLNLETMRAMQEGAKAMKTIHSGLDIDKVDETMDEIREQVELGDEISDAISRPLITGANEVDEDELDEELDMLAQENANQETSKIVNNNVNAAPISENKVSLPSVPSNKIKQSENSVKDGEEEEDEEDEDEKALRELQAEMGLGGGGSGGGGSGGGGSDDDLQARLNTLK
